# Supplementary material for: Loss of Neuropilin-2 in Murine Mesenchymal-like Colon Cancer Organoids Causes Mesenchymal-to-Epithelial Transition and an Acquired Dependency on Insulin-Receptor Signaling and Autophagy
Source: MDPI journal article supplement (doi:10.3390/cancers14030671), 2022-01-28
Supplement: s1 [file s1]

**a**

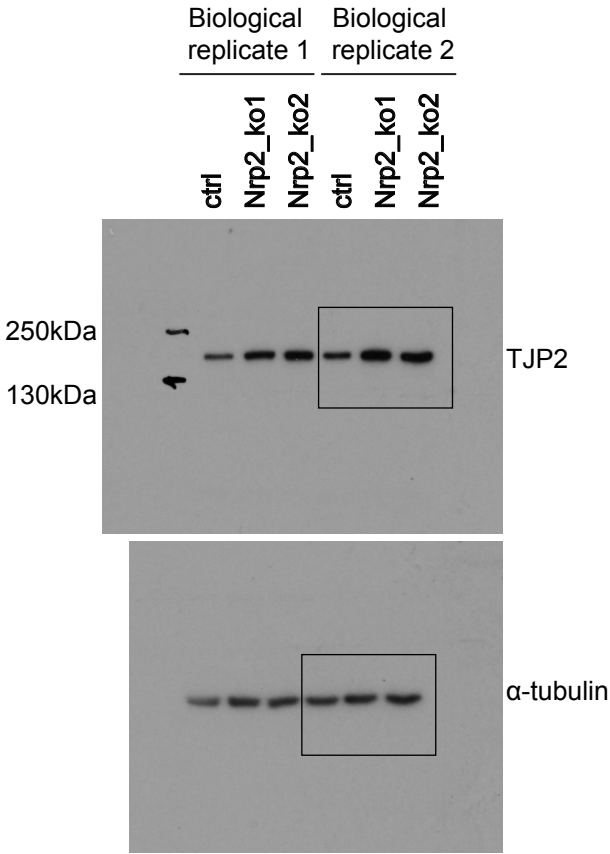

**b**

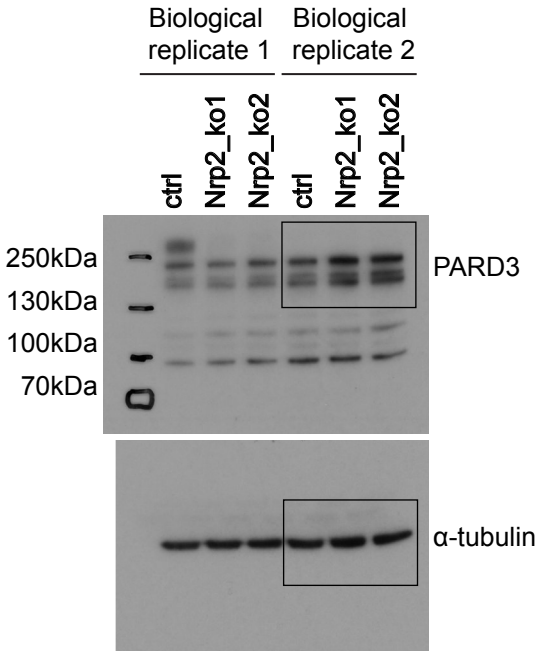

**Blot 4.** Immunoblots used to generate Figure S3. Representative blots from protein analysis of control and Nrp2-knockout CRC organoids. **(a)** TJP2 expression blot, **(b)** PARD3 expression blot. Bands used for figure generation are highlighted.
