# Supplementary material for: Loss of Neuropilin-2 in Murine Mesenchymal-like Colon Cancer Organoids Causes Mesenchymal-to-Epithelial Transition and an Acquired Dependency on Insulin-Receptor Signaling and Autophagy
Source: MDPI journal article supplement (doi:10.3390/cancers14030671), 2022-01-28
Supplement: s1 [file s1]

Supplement

**Loss of Neuropilin-2 in Murine Mesenchymal-like Colon Cancer Organoids Causes Mesenchymal-to-Epithelial Transition and an Acquired Dependency on Insulin-Receptor Signaling and Autophagy**

**Susanna Poghosyan, Nicola Frenkel, Aristeidis Lentzas, Jamila Laoukili, Inne Borel Rinkes, Onno Kranenburg, Jeroen Hagendoorn**

**Table S1.** Nrp2 single guide RNA (sgRNA) sequences

| sgRNA     | Exon | Strand  | Sequence 5'- 3'      |
|-----------|------|---------|----------------------|
| mNrp2- 1  | 1    | Forward | TGGATATGTTTCCTCTTACC |
| mNrp2- 2  |      | Forward | GGATATGTTTCCTCTTACCT |
| mNrp2- 3  | 2    | Reverse | GGAATTCAGCCGACCTCCGC |
| mNrp2- 4  |      | Reverse | TTCAGCCGACCTCCGCAGGG |
| mNrp2- 5  | 3    | Forward | CACCTCAGACTACGCCCGGC |
| mNrp2- 6  |      | Forward | AGTTCACCTCAGACTACGCC |
| mNrp2- 7  | 4    | Forward | GCATGACCCTCTACAAGTGG |
| mNrp2- 8  |      | Forward | GAGATTCAATGGTCCCATTG |
| mNrp2- 9  | 6    | Forward | CAATGGCTGGACACCCAATT |
| mNrp2- 10 |      | Forward | CCATGGAGCCGGCTCTGTTG |

**Table S2.** Nrp2 oligo sequences to clone into LentiCRISPRv2 sgRNA scaffold

| sgRNA oligo              | Sequence 5' - 3'                                       |
|--------------------------|--------------------------------------------------------|
| mNrp2- 1F<br>mNrp2- 1R   | CACCGTGGATATGTTTCCTCTTACC<br>AAACGGTAAGAGGAAACATATCCAC |
| mNrp2- 2F<br>mNrp2- 2R   | CACCGGGATATGTTTCCTCTTACCT<br>AAACAGGTAAGAGGAAACATATCCC |
| mNrp2- 3F<br>mNrp2- 3R   | CACCGGGAATTCAGCCGACCTCCGC<br>AAACGCGGAGGTCGGCTGAATCCC  |
| mNrp2- 4F<br>mNrp2- 4R   | CACCGTTCAGCCGACCTCCGCAGGG<br>AAACCCCTGCGGAGGTCGGCTGAAC |
| mNrp2- 5F<br>mNrp2- 5R   | CACCGCACCTCAGACTACGCCCCGC<br>AAACGCCGGGCGTAGTCTGAGGTGC |
| mNrp2- 6F<br>mNrp2- 6R   | CACCGAGTTCACCTCAGACTACGCC<br>AAACGGCGTAGTCTGAGGTGAACTC |
| mNrp2- 7F<br>mNrp2- 7R   | CACCGGCATGACCCTCTACAAGTGG<br>AAACCCACTTGTAGAGGGTCATGCC |
| mNrp2- 8F<br>mNrp2- 8R   | CACCGGAGATTCAATGGTCCCATTG<br>AAACCAATGGGACCATTGAATCTCC |
| mNrp2- 9F<br>mNrp2- 9R   | CACCGCAATGGCTGGACACCCAATT<br>AAACAATTGGGTGTCCAGCCATTGC |
| mNrp2- 10F<br>mNrp2- 10R | CACCGCCATGGAGCCGGCTCTGTTG<br>AAACCAACAGAGCCGGCTCCATGGC |

**Table S3.** Nrp2 genomic DNA primer<sup>1</sup> sequences for five Nrp2 CRISPR-Cas9 plasmids

| Primer                     | Sequence 5'- 3'                                   |
|----------------------------|---------------------------------------------------|
| NRP2_1.1_F<br>NRP2_1.1_R   | GGCTGGGAGACACCGAATAA<br>TAGCAGCTGTGGAAATGGGG      |
| NRP2_1.1_1F<br>NRP2_1.1_1R | GTCGGCACCACAAAACCAC<br>TTTTGTAGTCCAGCCCCTGC       |
| NRP2_5.1_F<br>NRP2_5.1_R   | ATGGTGCATCTGGCATCTGT<br>GGGGCACCTTGAGTTCTGTT      |
| NRP2_5.1_1F<br>NRP2_5.1_1R | TGGTGCATCTGGCATCTGTAG<br>GGCAGGGCTCTCTCCAATAG     |
| NRP2_3.1_F<br>NRP2_3.1_R   | ATTTATGAGGGCTTGAAACGTGC<br>AGCCTTGGGTGATGTACCTTTT |
| NRP2_3.1_1F<br>NRP2_3.1_1R | TCTCTGTACCTCCACCCAC<br>TGATGATAGCAGCTAACTTAACACA  |
| NRP2_6.1_F<br>NRP2_6.1_R   | AGCATCTGCTTCCACAGTCC<br>GAGCCCATCCCCAACAACT       |
| NRP2_6.1_1F<br>NRP2_6.1_1R | TCCAAGGCAGGCCATCATTT<br>CAGAGCCCATCCCCAACAAA      |
| NRP2_2.2_F<br>NRP2_2.2_R   | AACGATGCTCCTGCTCTTACG<br>TG GTAACATGGACTGCCAAGG   |
| NRP2_2.2_1F<br>NRP2_2.2_1R | GATGCTCCTGCTCTTACGTG<br>GTAACATGGACTGCCAAGGG      |

<sup>1</sup> Primers were designed based on mouse Nrp2 NCBI reference sequence NC\_000067.6 using NCBI primer design tool. Primer quality and annealing temperatures were checked using NCBI and NEB Tm calculator tools.

**Table S4.** Murine organoid culture medium composition

| Component                      | Supplier (catalog number) | Concentration    |
|--------------------------------|---------------------------|------------------|
| Advanced DMEM/F12 basal medium | Gibco (12634-010)         | 1x (500ml total) |
| HEPES buffer                   | Lonza (BE17-737E)         | 10mM             |
| Penicillin-Streptomycin        | Gibco (15070-063)         | 50U/ml           |
| GlutaMAX                       | Gibco (35050-038)         | 2mM              |
| Noggin conditioned medium      | 293T-mNoggin-Fc cell line | 100ng/ml         |
| B27, serum free                | Invitrogen (17504-044)    | 1x               |
| Recombinant murine FGF-basic   | PeproTech (450-33)        | 10ng/ml          |

**Table S5.** The list of antibodies

| Assay        | Antibody (clone)                  | Supplier (catalog number)        | Dilution |
|--------------|-----------------------------------|----------------------------------|----------|
| Western blot | TJP2                              | Invitrogen (71-1400)             | 1:150    |
|              | LC3II (0510)                      | Nanotools (0231-100/LC3-5F10)    | 1:1000   |
|              | Nrp2 (D39A5)                      | Cell Signaling (3366)            | 1:1000   |
|              | IR- $\beta$ (4B8)                 | Cell signaling (3025)            | 1:1000   |
|              | phospho IGFIR $\beta$ -IR $\beta$ | Cell signaling (3021)            | 1:1000   |
|              | PI3 kinase p85                    | Cell signaling (4292)            | 1:1000   |
|              | phospho PI3 kinase p85/p55        | Cell signaling (4228S)           | 1:1000   |
|              | p44/42 MAPK (Erk1/2) (137F5)      | Cell signaling (4695)            | 1:1000   |
|              | phospho P44/42 MAPK (Erk1/2)      | Cell signaling (9101)            | 1:1000   |
|              | PARD3/ Par3                       | Novus Biologicals (NBP1-88861)   | 1:150    |
|              | Occludin (OCLN)                   | Thermofisher (40-4700)           | 1:250    |
|              | $\beta$ -actin (AC-15)            | Novus Biologicals (NB600-501)    | 1:10000  |
|              | $\alpha$ -tubulin (B-5-1-2)       | Sigma (T5168)                    | 1:10000  |
|              | Goat anti-rabbit IgG HRP          | Dako (P0448)                     | 1:1000   |
|              | Goat anti-mouse IgG HRP           | Dako (P0447)                     | 1:2000   |
| IHC          | ZEB1 (2A8A6)                      | Novus Biologicals (NBP2-23484SS) | 1:250    |
|              | Slug                              | Novus Biologicals (NBP2-27182SS) | 1:100    |
|              | TJP2                              | Novus Biologicals (NBP1-86850)   | 1:100    |
|              | LC3II (0510)                      | Nanotools (0231-100/LC3-5F10)    | 1:100    |
|              | IR- $\beta$ (E9L5V)               | Cell signaling (23413S)          | 1:50     |
|              | PARD3/ Par3                       | Novus Biologicals (NBP1-88861)   | 1:500    |
|              | Occludin (OCLN)                   | Thermofisher (40-4700)           | 1:100    |
| IF           | LC3II (0510)                      | Nanotools (0231-100/LC3-5F10)    | 1:50     |
|              | p62/SQSTM1                        | Novus Biologicals (NBP1-48320)   | 1:200    |
|              | Cleaved caspase-3                 | Cell Signaling (9661S)           | 1:400    |
|              | PARD3/ Par3                       | Novus Biologicals (NBP1-88861)   | 1:50     |
|              | TJP2                              | Invitrogen (71-1400)             | 1:300    |
|              | IR- $\beta$ (E9L5V)               | Cell signaling (23413S)          | 1:50     |
|              | Nrp2 (D39A5)                      | Cell Signaling (3366)            | 1:1000   |
|              | DAPI                              | Sigma (D9542)                    | 1:1000   |
|              | Phalloidin AlexaFluor488          | ThermoFisher (A12379)            | 1:500    |
|              | Alexa Fluor 568                   | ThermoFisher (A11036)            | 1:500    |

**Figure S1.** Generation and characterization of Nrp2<sup>-/-</sup> CRC organoids. (a) Schematic view of lentiviral plasmids used for Nrp2<sup>-/-</sup> (left) or control (right) CRC organoid generation. (b) Sanger sequencing data used to analyze % of DNA with insertions and/or deletions in CRC organoid genomic DNA targeted location. Inference of CRISPR Edits (ICE) tool from Synthego was used. (c) Principal component analysis (PCA) for RNAseq data. Samples were sequenced in three replicates. (d) Cell cycle analysis by quantification of DNA content (propidium iodide) in CRC organoids. (e) Immunofluorescence analysis for Nrp2 expression in CRC organoids. Representative organoid images are depicted, where DAPI-stained nuclei are shown in blue, and membranous Nrp2 is shown in red. Scale bars: 15µm. (f) Western blot analysis for Nrp2 expression in CRC organoids.

**Figure S2.** Increased receptor tyrosin kinase (RTK) and tight junction protein (TJP) RNA expression in Nrp2<sup>-/-</sup> CRC organoids. (a) RTK and (b) TJP RNA expression in control and Nrp2<sup>-/-</sup> CRC organoids determined by RNA sequencing, represented in heatmaps. Samples were sequenced in three replicates.

**Figure S3.** Increased tight junction protein expression in Nrp2<sup>-/-</sup> CRC organoids. (a) TJP2 RNA and protein expression analysis in CRC organoids via RNAseq and western blotting, respectively. (b) PARD3 RNA and protein expression analysis in CRC organoids via RNAseq and western blotting, respectively.

**Figure S4.** Increased autophagic flux in Nrp2<sup>-/-</sup> CRC organoids. Immunofluorescence analysis of CRC organoids after treatment with an early autophagy inhibitor (Spautin-1) or late autophagy inhibitor (Chloroquine). Each inhibitor was used at 30µM concentration for 24h. Representative organoid images are depicted, where DAPI-stained nuclei are shown in blue, and p62 and LC3 puncta are shown in red. Mean fluorescence intensity was quantified relative to the control (n=5). Scale bars: 15µm. Error bars are presented as SD from the arithmetic mean. Statistical significance on graphs is indicated p≤0.05 by \*, p≤0.01 by \*\*, p≤0.001 by \*\*\*, p≤0.0001 by \*\*\*\*.

**Figure S5.** Decreased viability and regeneration in Nrp2<sup>-/-</sup> CRC organoids. (a) CellTiter-glo 3D viability analysis of CRC organoids after single or combination treatment with early autophagy inhibitor (Spautin-1) (30µM) and IR signaling inhibitor (Linsitinib) (5µM or 15µM) for 24h. Relative luminescence signal was quantified relative to the 100% untreated control. (b) Colony forming assay by CRC organoids. Number of colonies were counted two weeks after single cell seeding, and quantified relative to the control (n=3). Error bars are presented as SD from the arithmetic mean. Statistical significance on graphs is indicated p≤0.05 by \*, p≤0.0001 by \*\*\*\*.

**Figure S6.** Immunoblots used to generate Figure 4b. Representative blots from protein analysis of insulin-stimulated CRC organoids. Bands used for figure generation are highlighted.

**Figure S7.** Immunoblots used to generate Figure 5b. Representative blots from protein analysis of the control and Nrp2<sup>-/-</sup> CRC organoids. Bands used for figure generation are highlighted.

**Figure S8.** Immunoblots used to generate Figure S1. Representative blots from protein analysis of the control and Nrp2<sup>-/-</sup> CRC organoids. Bands used for figure generation are highlighted.

**Figure S9.** Immunoblots used to generate Figure S3. Representative blots from protein analysis of control and Nrp2<sup>-/-</sup> CRC organoids. (a) TJP2 expression blot, (b) PARD3 expression blot. Bands used for figure generation are highlighted.
