# Supplementary figures and images for: Loss of Neuropilin-2 in Murine Mesenchymal-like Colon Cancer Organoids Causes Mesenchymal-to-Epithelial Transition and an Acquired Dependency on Insulin-Receptor Signaling and Autophagy
Source: MDPI journal article supplement (doi:10.3390/cancers14030671), 2022-01-28

**a**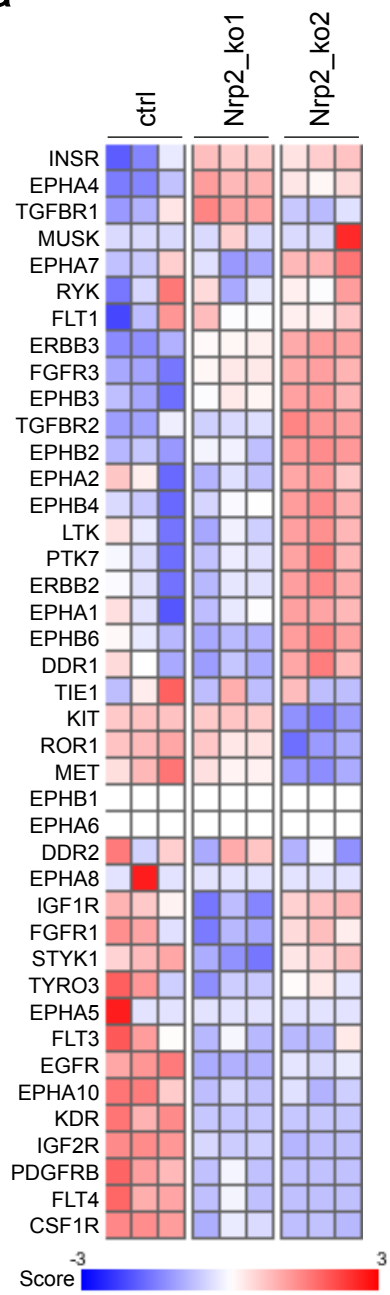**b**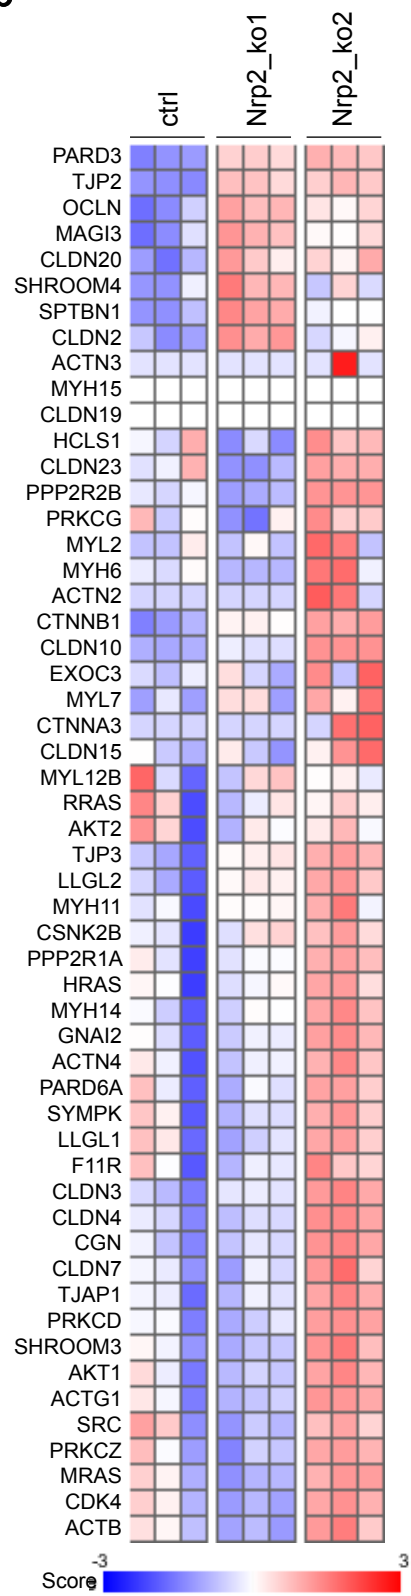

Supplement: s1 [file s1]

**a**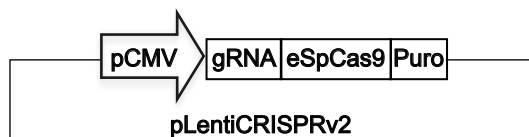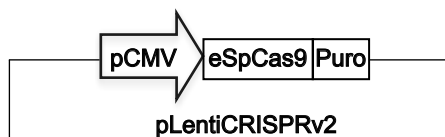**b**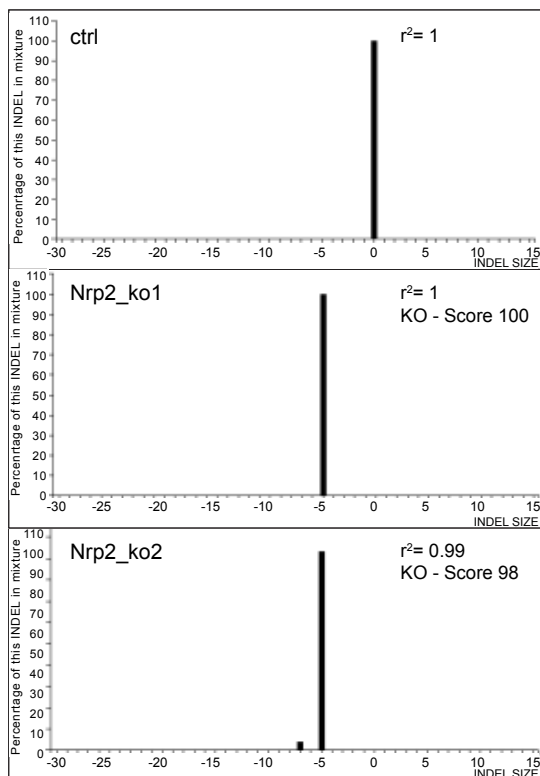**c**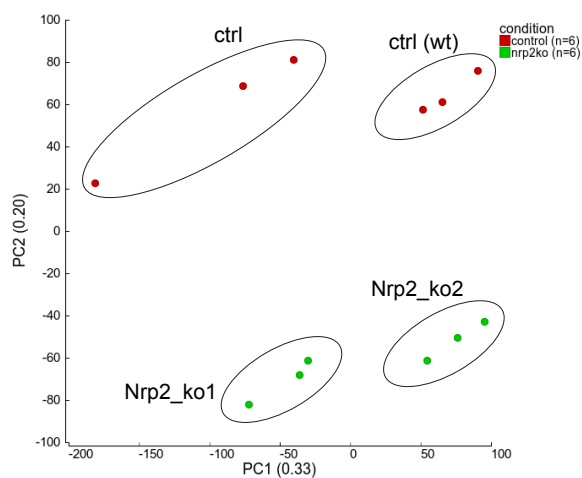**d**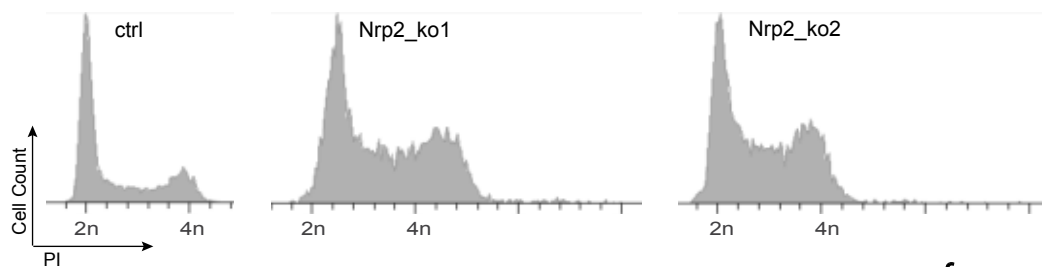**e**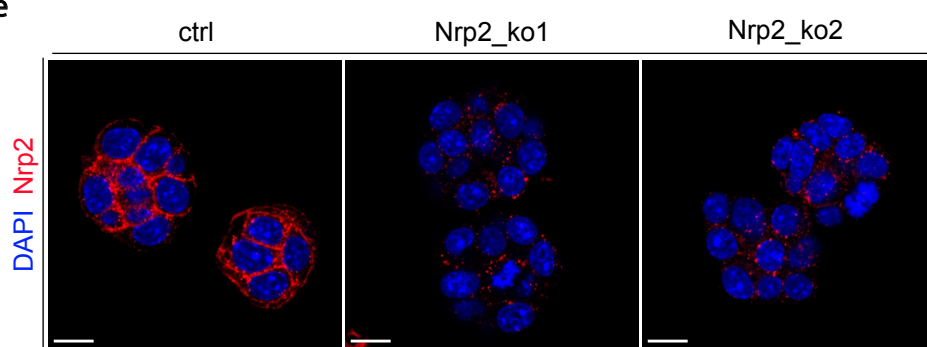**f**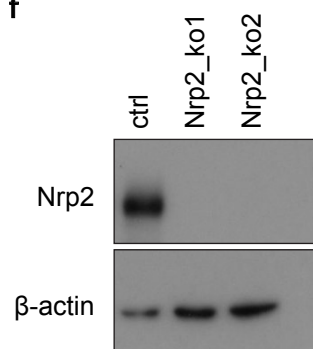

Supplement: s1 [file s1]

**a**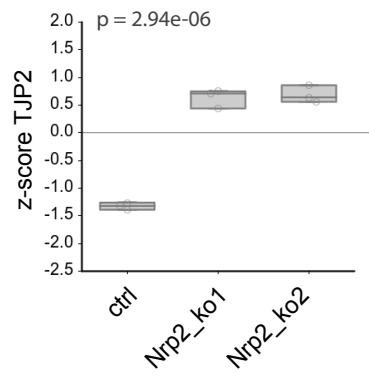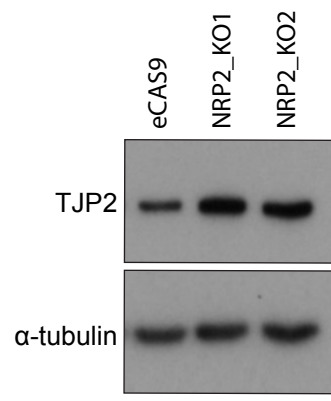**b**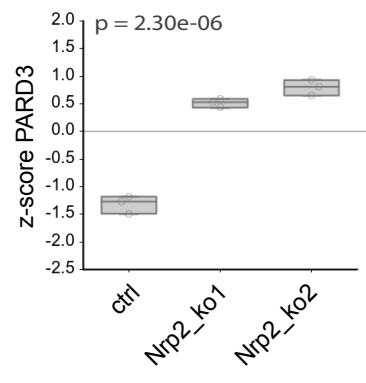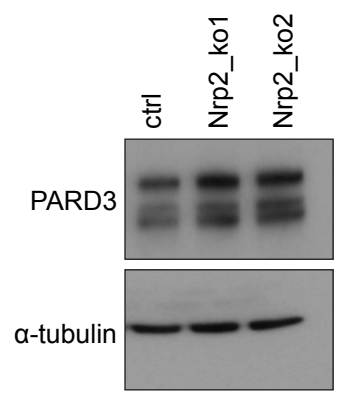

Supplement: s1 [file s1]

**a**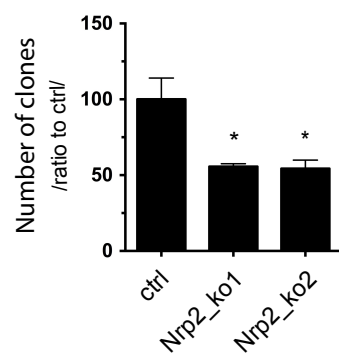**b**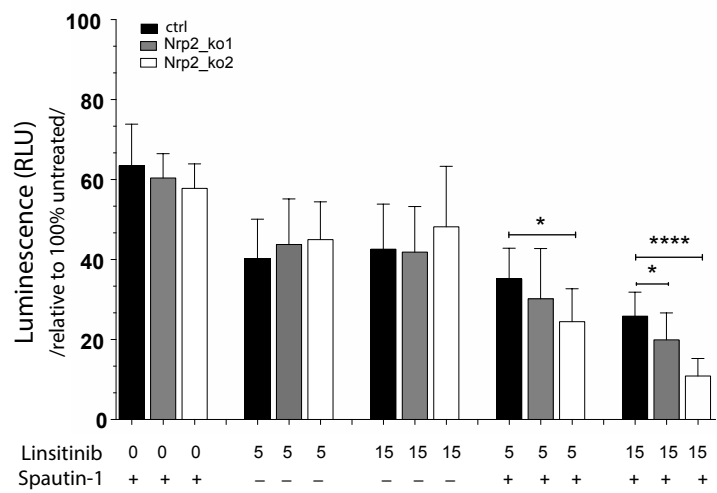

Supplement: s1 [file s1]

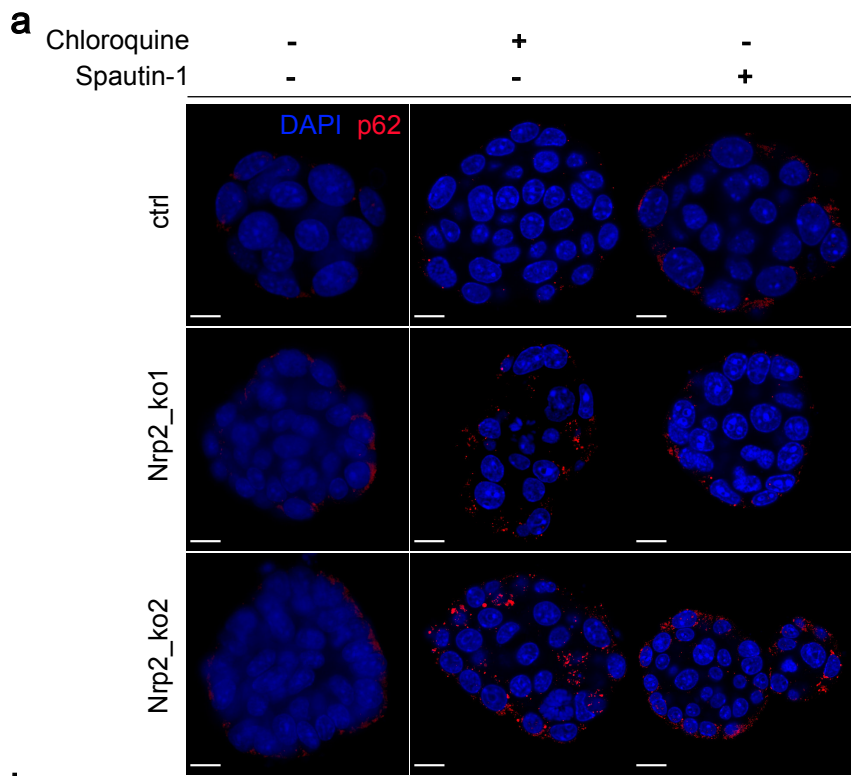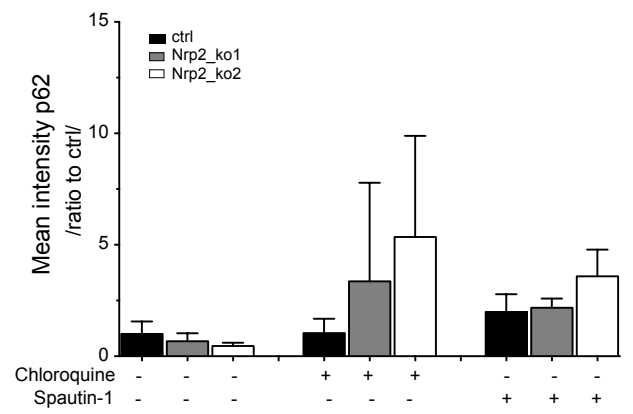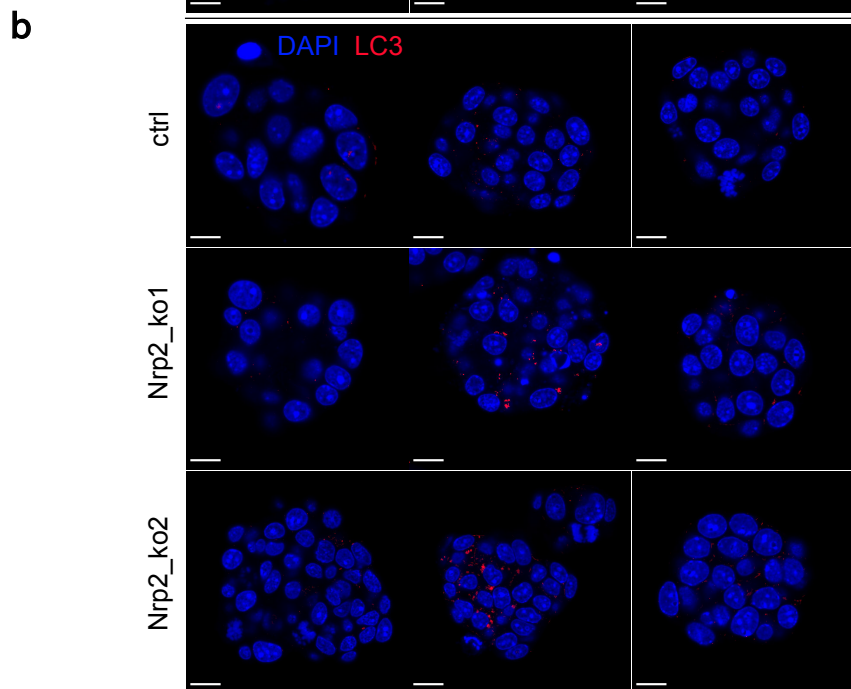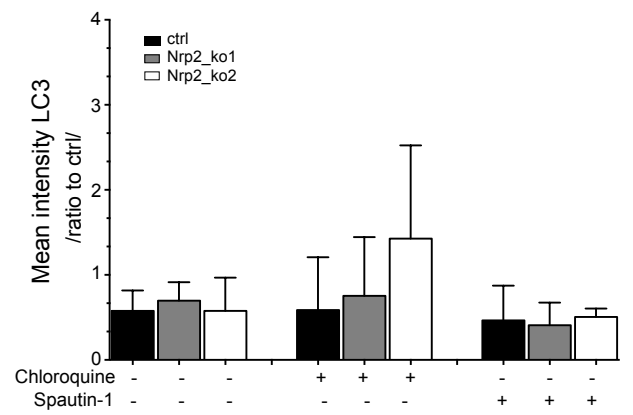

Supplement: s1 [file s1]
